# Supplementary material
Source: Springer Nature journal article supplement (https://www.springermedizin.de/resource/supplementary/12889_2006_602_MOESM7_ESM.pdf/9501264)
Supplement: MOESM7 [file 9501264]

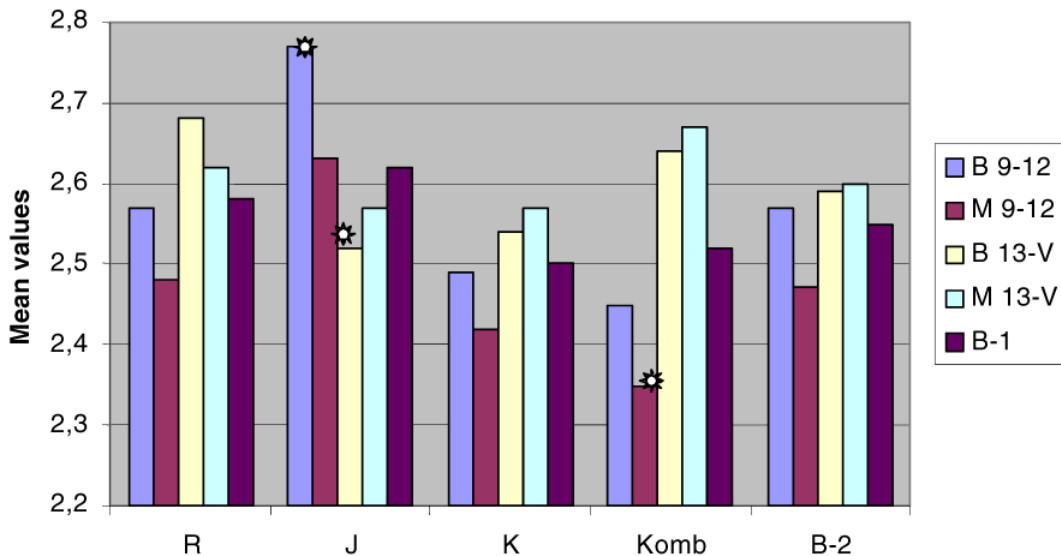

\* -  $p < 0,05$

R – Types of disability - vision

J – Types of disability - movement

K – Types of disability - auditory

Komb. – Types of disability - combined

B-2 – Total age group index

B-1 – Total disability index

B 9-12 – Age and sex groups boys

M 9-12 – Age and sex groups girls

B 13-V – Age and sex groups boys

M 13-V – Age and sex groups girls
